# Supplementary figures and images for: Proteolytic regulation of a galectin-3/Lrp1 axis controls osteoclast-mediated bone resorption
Source: PubMed Central journal article supplement — J Cell Biol. 2023 Mar 2;222(4):e202206121. doi: 10.1083/jcb.202206121 (PMC9998966; doi:10.1083/jcb.202206121), 2023-03-02

**Fig. 2 G**

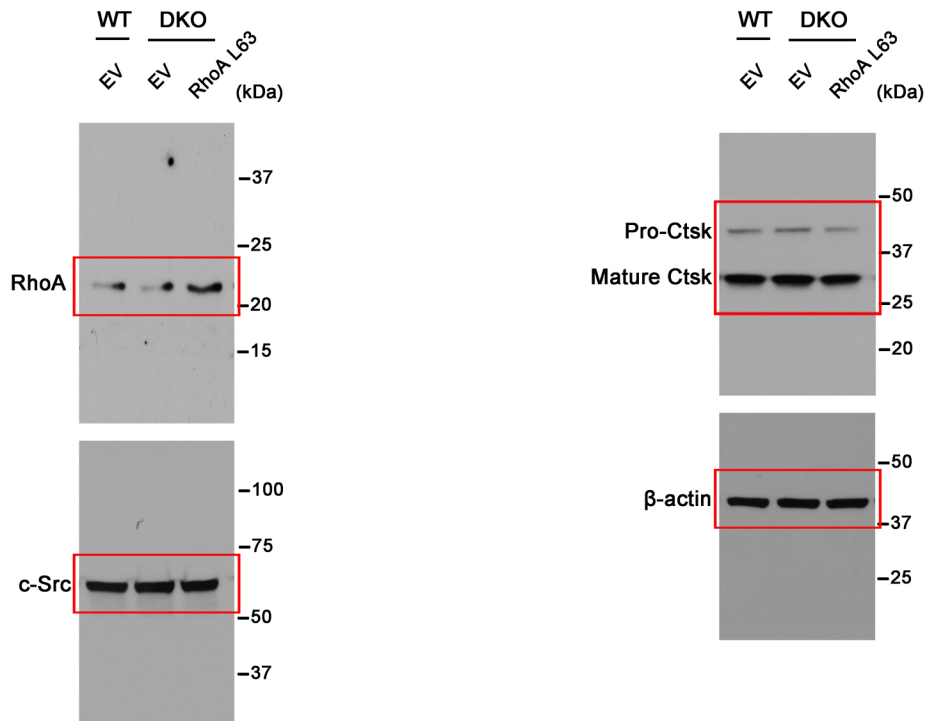

Supplement: JCB_202206121_SourceDataF2.pdf [file JCB_202206121_SourceDataF2.pdf]

**Fig. 4 A**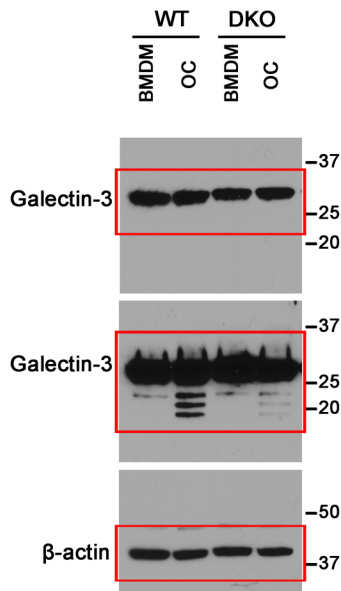**Fig. 4 E**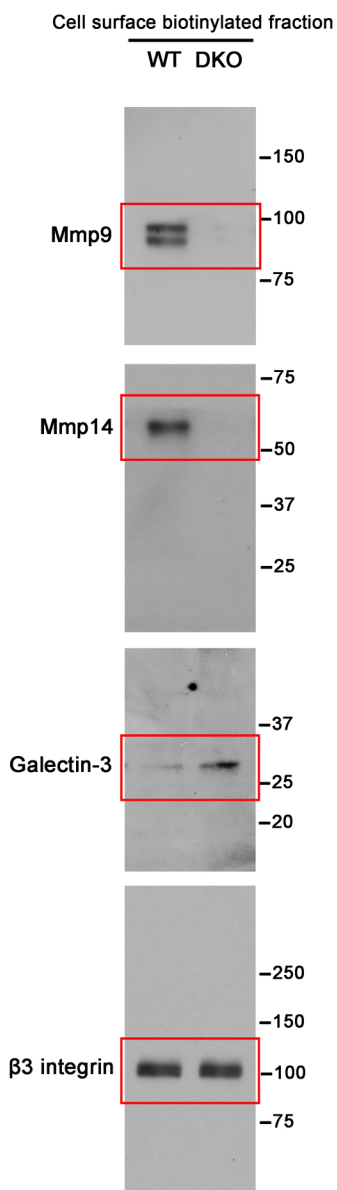**Fig. 4 H**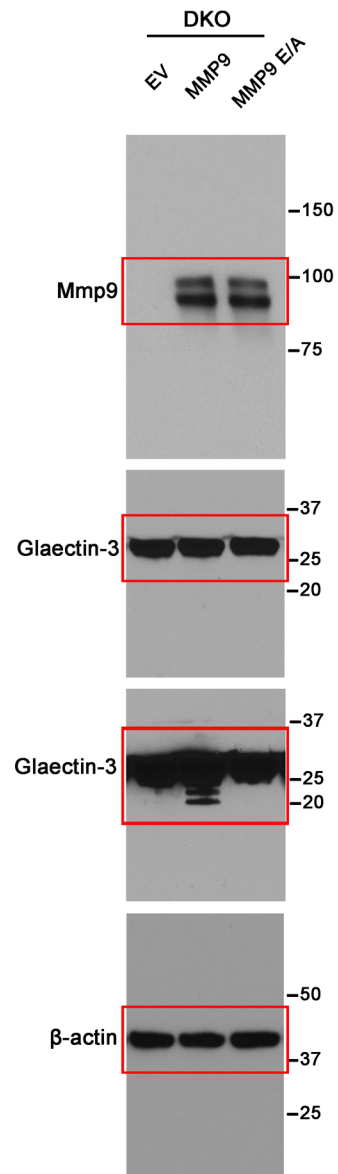**Fig. 4 I**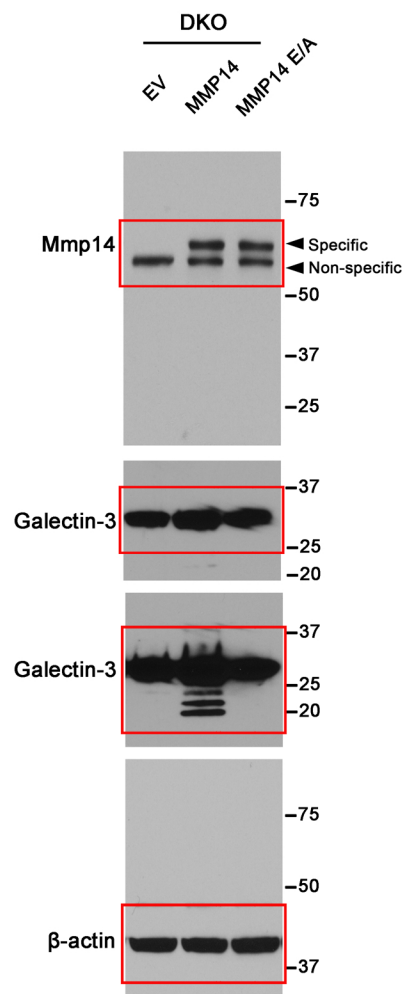

Supplement: JCB_202206121_SourceDataF4.pdf [file JCB_202206121_SourceDataF4.pdf]

**Fig. 5 B**

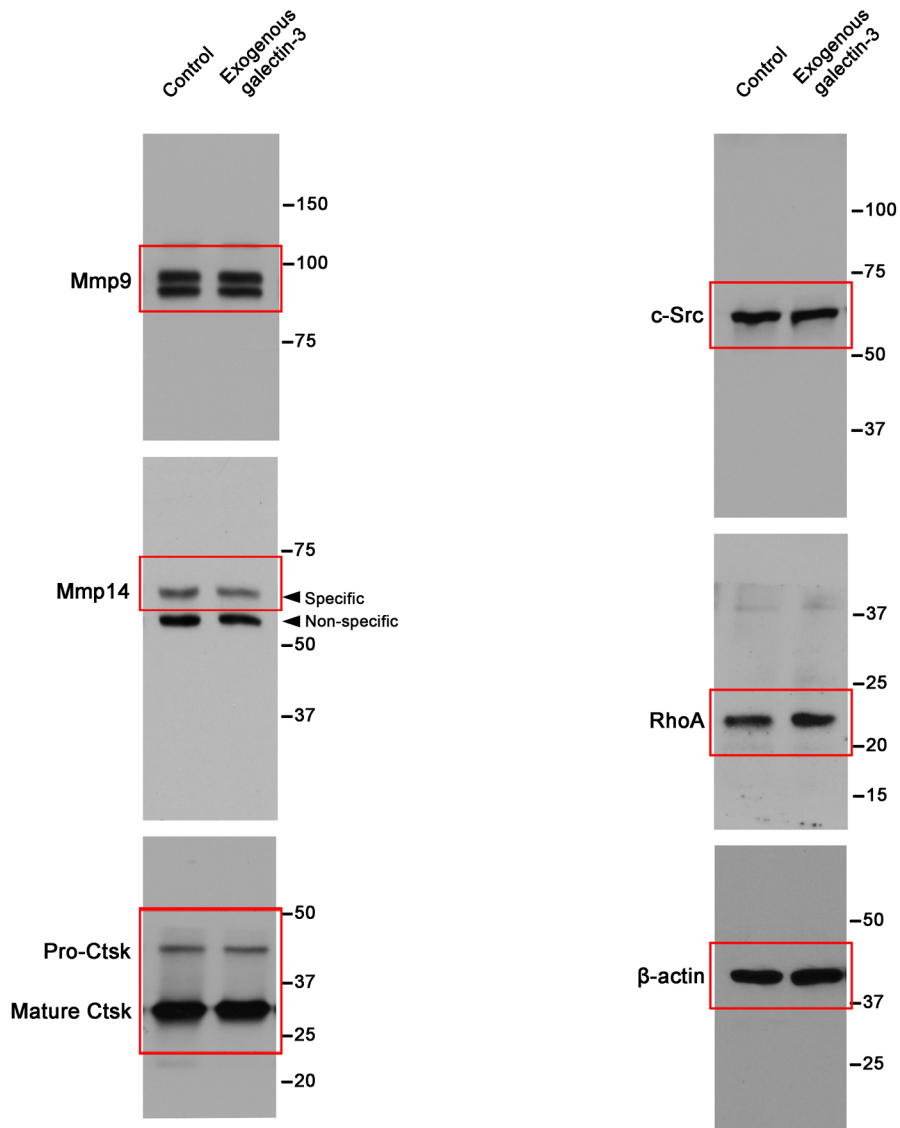

Supplement: JCB_202206121_SourceDataF5.pdf [file JCB_202206121_SourceDataF5.pdf]

**Fig. 7 A**

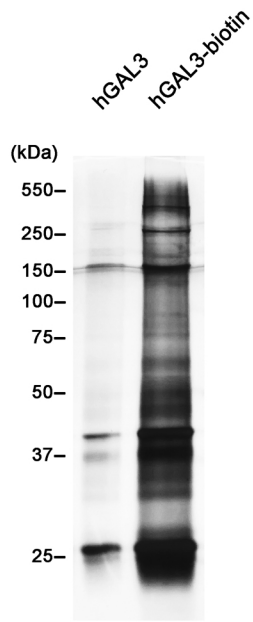

**Fig. 7 E**

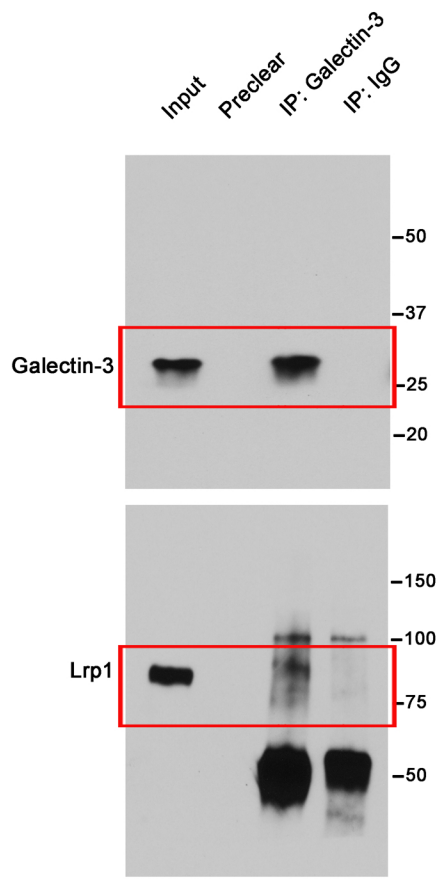

**Fig. 7 D**

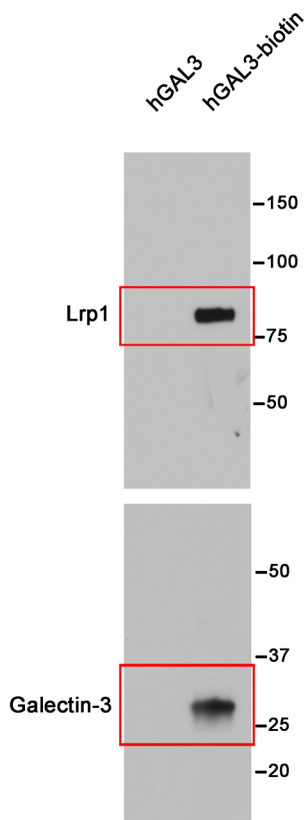

**Fig. 7 H**

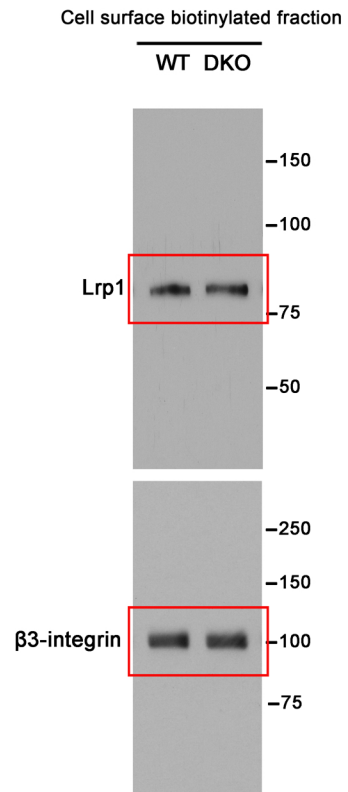

Supplement: JCB_202206121_SourceDataF7.pdf [file JCB_202206121_SourceDataF7.pdf]

**Fig. 8 A**

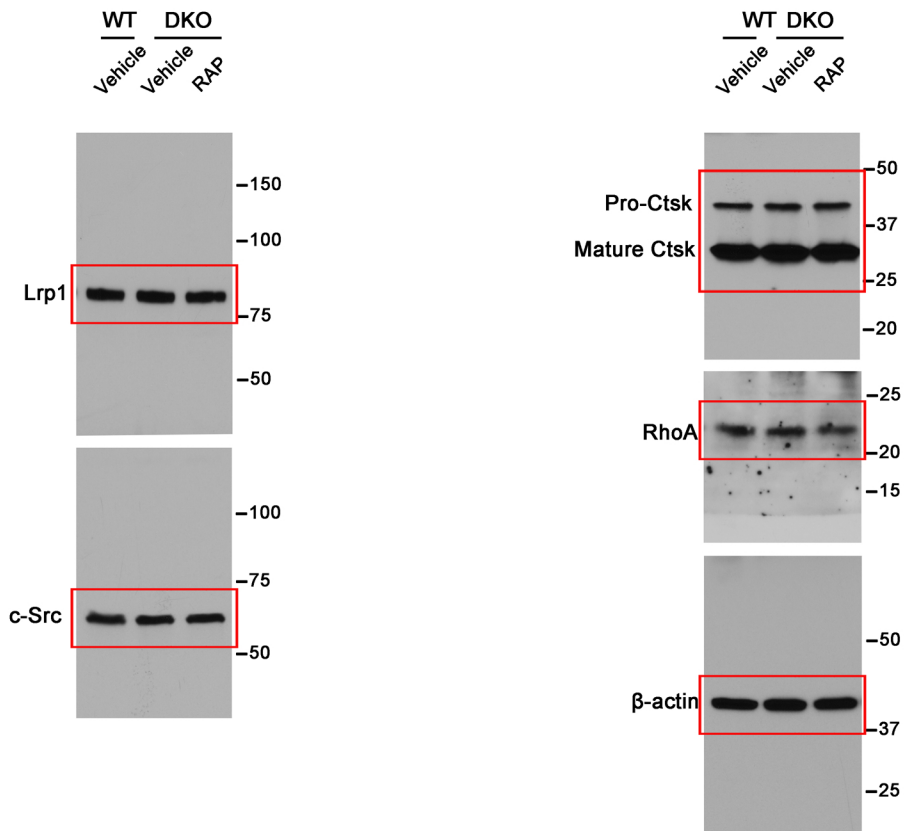

Supplement: JCB_202206121_SourceDataF8.pdf [file JCB_202206121_SourceDataF8.pdf]

**Fig. 9 A**

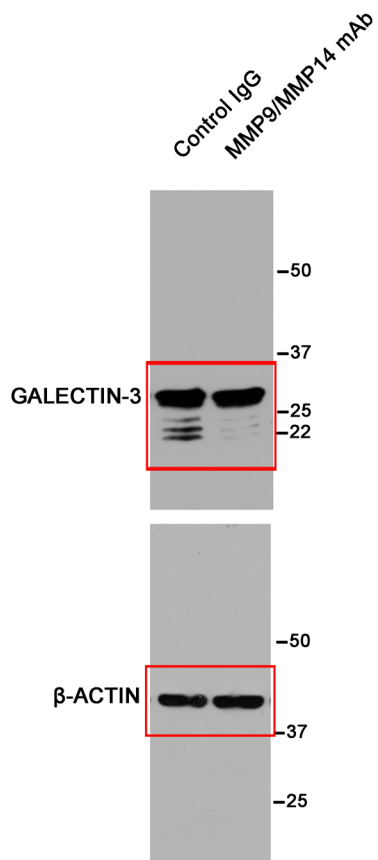

**Fig. 9 F**

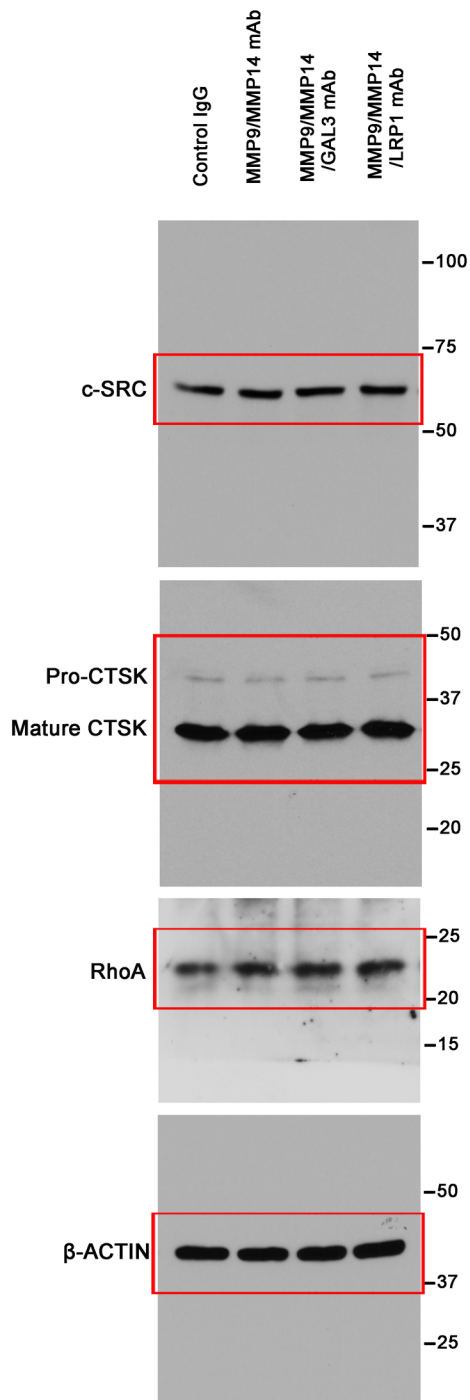

Supplement: JCB_202206121_SourceDataF9.pdf [file JCB_202206121_SourceDataF9.pdf]

**Fig. S1 E**

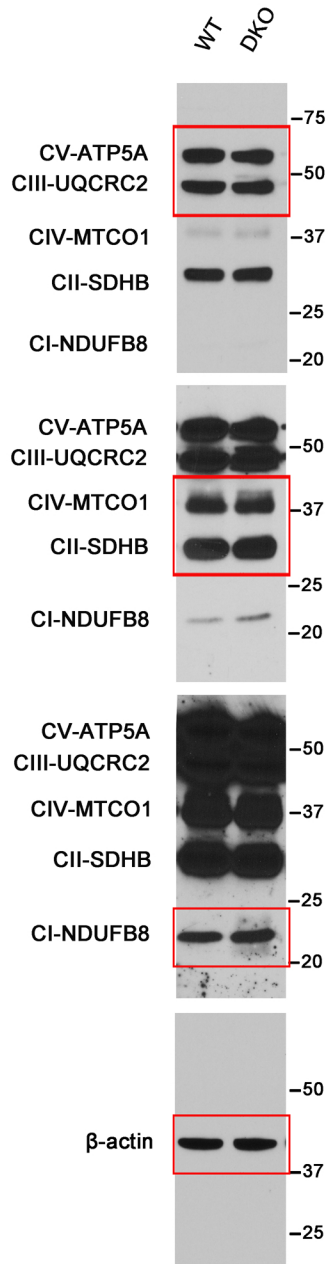

Supplement: JCB_202206121_SourceDataFS1.pdf [file JCB_202206121_SourceDataFS1.pdf]

**Fig. S3 H**

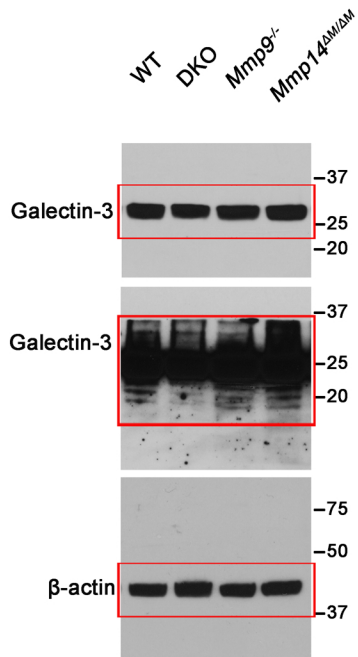

Supplement: JCB_202206121_SourceDataFS3.pdf [file JCB_202206121_SourceDataFS3.pdf]

**Fig. S4 A**

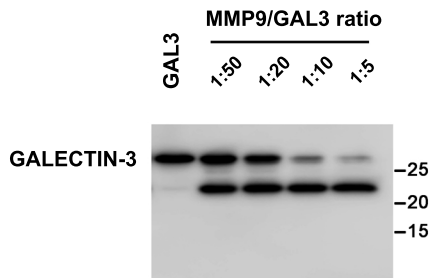

**Fig. S4 B**

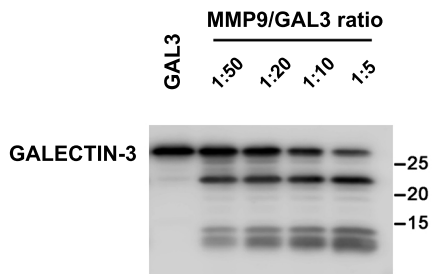

**Fig. S4 D**

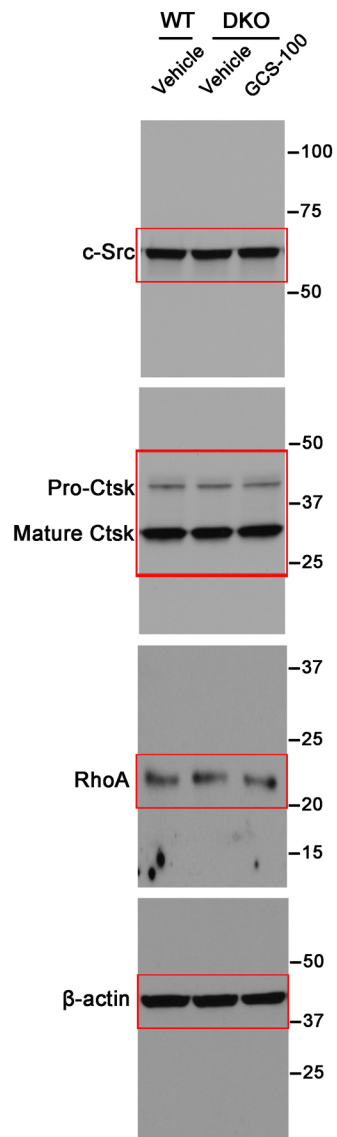

Supplement: JCB_202206121_SourceDataFS4.pdf [file JCB_202206121_SourceDataFS4.pdf]

**Fig. S5 A**

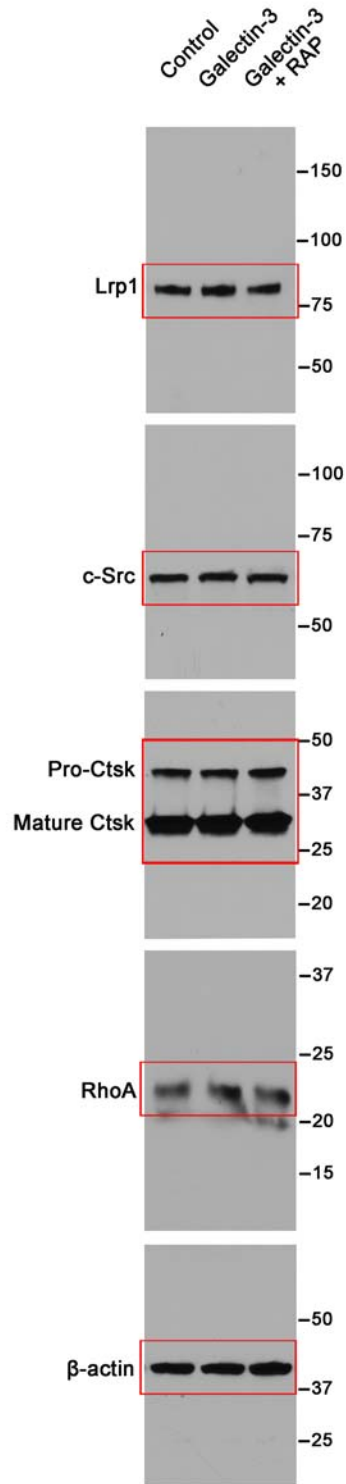

**Fig. S5 F**

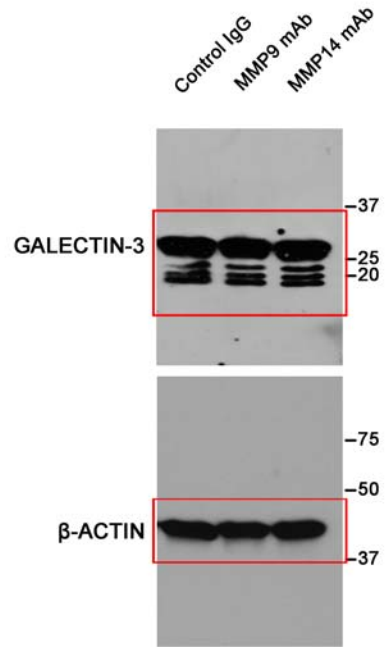

Supplement: JCB_202206121_SourceDataFS5.pdf [file JCB_202206121_SourceDataFS5.pdf]
